# Supplementary material for: Trehalose-Based Nucleolipids as Nanocarriers for Autophagy Modulation: An In Vitro Study
Source: MDPI journal article supplement (doi:10.3390/pharmaceutics14040857), 2022-04-13
Supplement: s1 [file s1]

## Supporting Information

### **Trehalose-Based Nucleolipids as Nanocarriers for Autophagy Modulation: An In Vitro Study**

Anthony Cunha 1,2, Alexandra Gaubert 1, Julien Verget 1, Marie-Laure Thiolat 2, Philippe  
Barthélémy 1, Laurent Latxague 1,†,‡ and Benjamin Dehay 2,\*,‡

<sup>1</sup> Univ. Bordeaux, INSERM U1212, CNRS UMR 5320, ARNA, ARN: Régulations Naturelle et Artificielle, ChemBioPharm,  
146 rue Léo Saignat, 33076 Bordeaux CEDEX, France

<sup>2</sup> Univ. Bordeaux, CNRS, IMN, UMR 5293, F-33000 Bordeaux, France

\* Correspondence: [benjamin.dehay@u-bordeaux.fr](mailto:benjamin.dehay@u-bordeaux.fr)

† Deceased 13 December 2021.

‡ These authors contributed equally to this work.

## IR spectroscopy

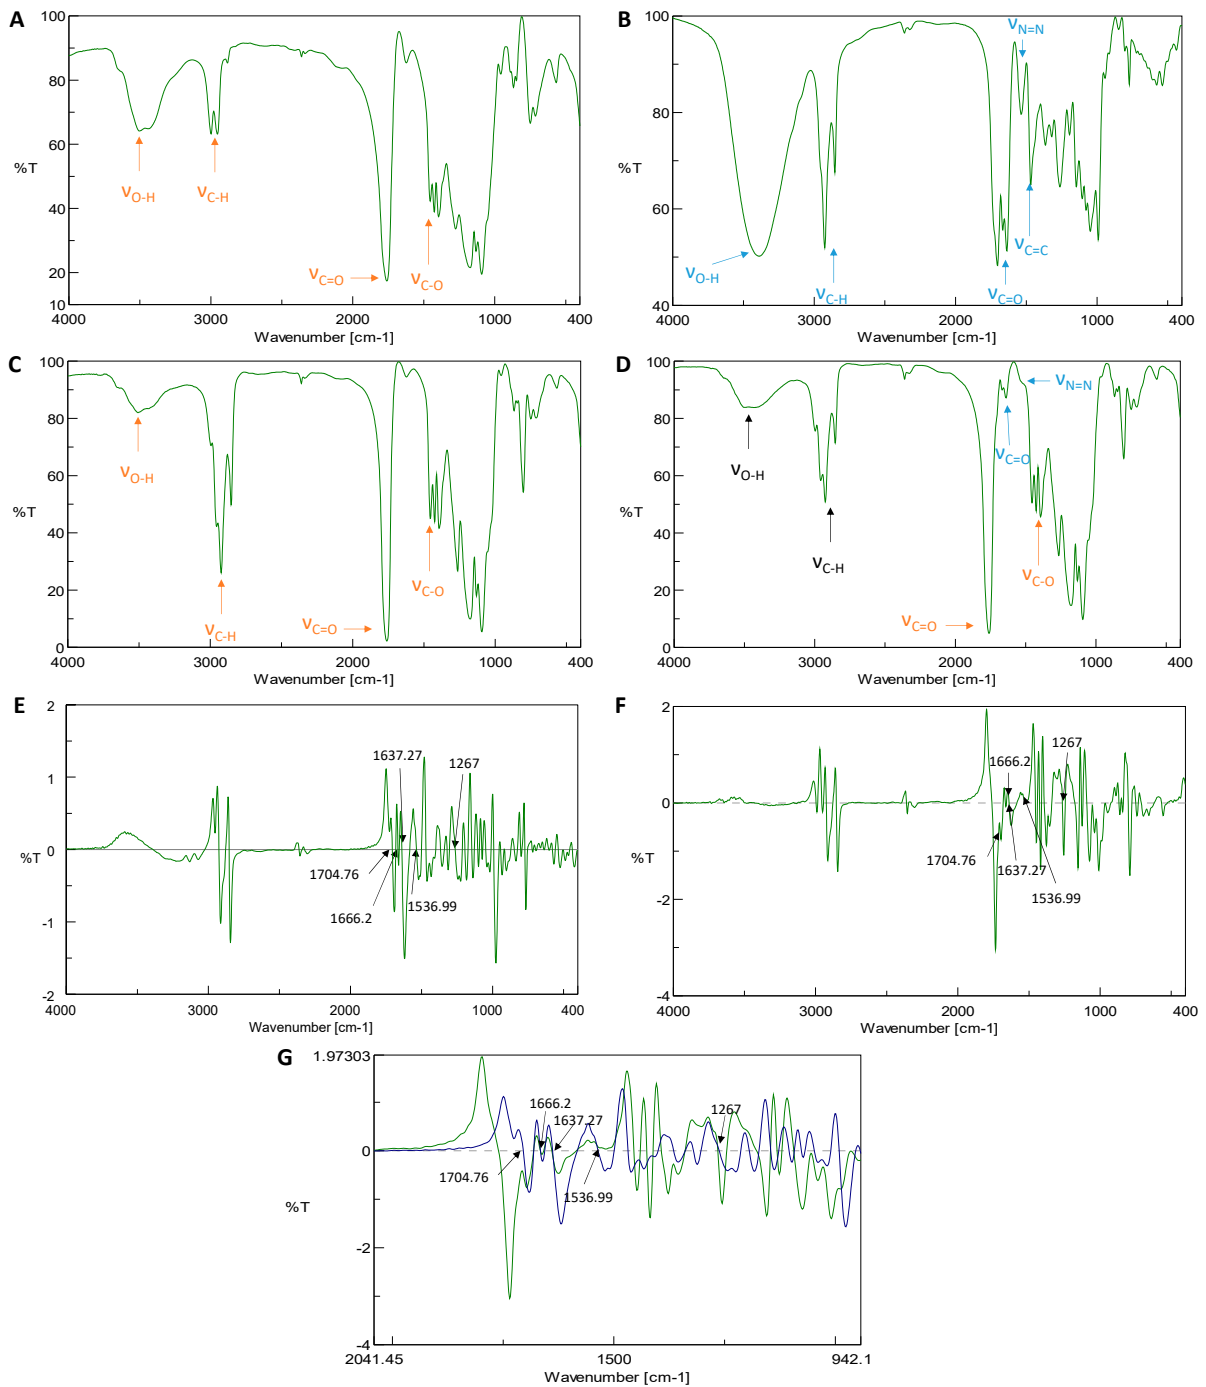

**Figure S1. Infrared analysis of PLGA, GNL, and (un)loaded PLGA NPs.** IR spectra of (A) PLGA, (B) GNL, (C) F2 and (D) F4, acquired in transmission mode. First derivative of (E) GNL, (F) F4 (Savitzky-Golay: Derivative order 1, Polynomial order 2 and window of 7 points) and (G) zoom of both first derivatives.

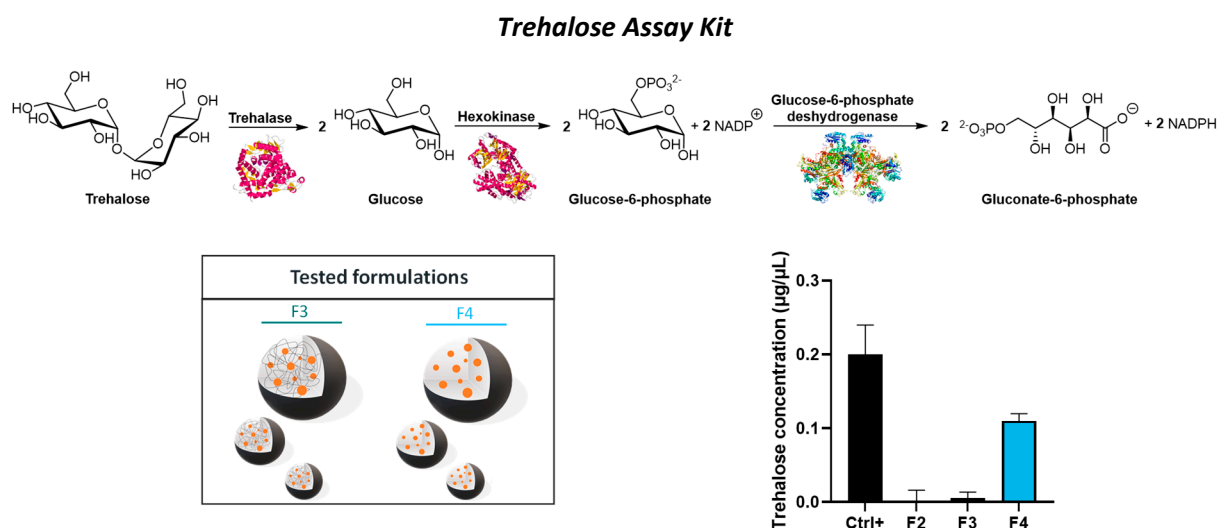

**Figure S2. Principle of the enzymatic determination of trehalose.** Enzymatic degradation of trehalose allowing the quantification of non-encapsulated GNL by UV spectroscopy.

### UV spectroscopy

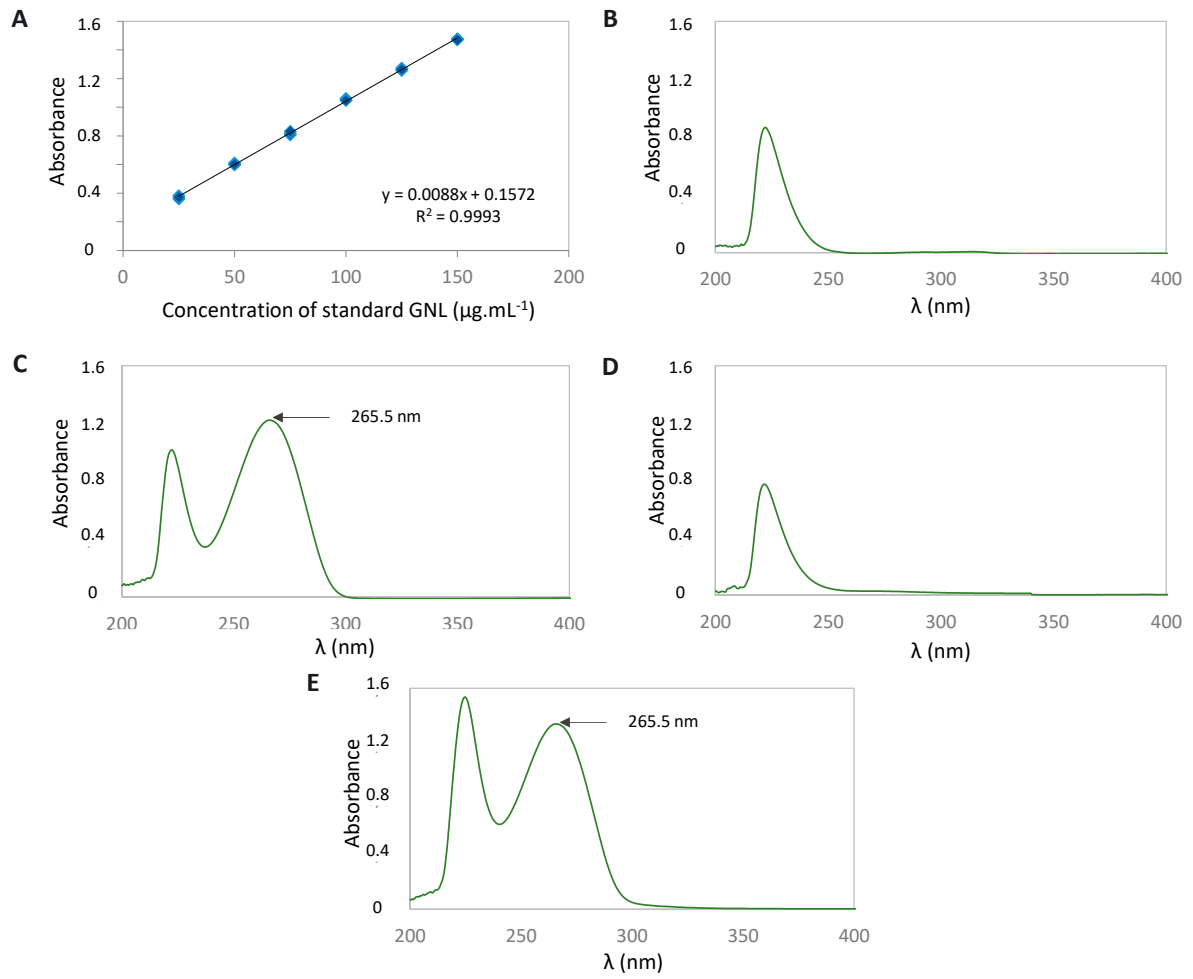

**Figure S3. UV spectroscopy assays.** (A) Calibration curve of GNL in methanol (concentration: 0.5 to 40  $\mu\text{g.mL}^{-1}$ ; absorbance at 266.5 nm). UV spectra of (B) PLGA, (C) GNL, (D) F2 and (E) F4.

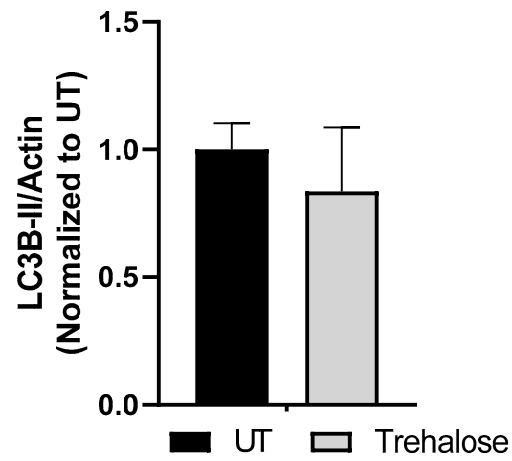

**Figure S4. Biological evaluation of the condition of trehalose at the same concentration contained in the nanovectors.** Quantification of LC3 protein levels normalized by actin in BE (2)-M17 cells treated with molecular trehalose for 24 h (n= 3).
